1 **Loss of IL-10 signaling promotes IL-22 dependent host defenses against acute**  
2 ***Clostridioides difficile* infection**

3

4 Emily S. Cribas<sup>1</sup>, Joshua E. Denny<sup>1</sup>, Jeffrey R. Maslanka<sup>1</sup>, Michael C. Abt<sup>1</sup>

5

6 <sup>1</sup>Department of Microbiology, Perelman School of Medicine, University of Pennsylvania,

7 Philadelphia, Pennsylvania, USA.

8

9 **Running title: Loss of IL-10 signaling promotes host immune defense against *C. difficile***  
10 **infection**

11

12 \*CORRESPONDENCE: Michael Abt. [Michael.abt@pennmedicine.upenn.edu](mailto:Michael.abt@pennmedicine.upenn.edu); 215-898-0596 (P)

13

14 Abbreviations used: <sup>HET</sup> - heterozygous, p.i. – post infection, ASV – Amplicon Sequence Variant

15

16

17

18

19

20

21

22

23

24

25

26

1 **Abstract**

2 Infection with the bacterial pathogen *Clostridioides difficile* causes severe damage to the intestinal  
3 epithelium that elicits a robust inflammatory response. Markers of intestinal inflammation  
4 accurately predict clinical disease severity. However, determining the extent to which host-derived  
5 proinflammatory mediators drive pathogenesis versus promote host protective mechanisms  
6 remains elusive. In this report, we employed *Il10*<sup>-/-</sup> mice as a model of spontaneous colitis to  
7 examine the impact of constitutive intestinal immune activation, independent of infection, on *C.*  
8 *difficile* disease pathogenesis. Upon *C. difficile* challenge, *Il10*<sup>-/-</sup> mice exhibited significantly  
9 decreased morbidity and mortality compared to littermate *Il10* heterozygote (*Il10*<sup>HET</sup>) control mice,  
10 despite a comparable *C. difficile* burden, innate immune response, and microbiota composition  
11 following infection. Similarly, antibody-mediated blockade of IL-10 signaling in wild-type C57BL/6  
12 mice conveyed a survival advantage if initiated three weeks prior to infection. In contrast, no  
13 advantage was observed if blockade was initiated on the day of infection, suggesting that  
14 constitutive activation of inflammatory defense pathways prior to infection mediated host  
15 protection. IL-22, a cytokine critical in mounting a protective response against *C. difficile* infection,  
16 was elevated in the intestine of uninfected, antibiotic-treated *Il10*<sup>-/-</sup> mice, and genetic ablation of  
17 the IL-22 signaling pathway in *Il10*<sup>-/-</sup> mice negated the survival advantage following *C. difficile*  
18 challenge. Collectively, these data demonstrate that constitutive loss of IL-10 signaling, via  
19 genetic ablation or antibody blockade, enhances IL-22 dependent host defense mechanisms to  
20 limit *C. difficile* pathogenesis.

21

22

23

24

25

26

## 1 Introduction

2 *Clostridioides difficile* is a leading cause of nosocomial infections in the United States. High  
3 recurrence rates, increases in community-acquired infections, and the emergence of antibiotic-  
4 resistant strains render *C. difficile* an urgent threat to our public health system<sup>1-5</sup>. The  
5 manifestation of *C. difficile* infection is highly variable; ranging from asymptomatic colonization,  
6 diarrhea, and pseudomembranous colitis, to severe cases of toxic megacolon and death<sup>6</sup>.  
7 Disease severity is shaped by the host immune response and patients on immunosuppressants  
8 or with autoimmune disorders are more susceptible to severe disease<sup>7-9</sup>. Taken together, there  
9 is a need to study the host immune response to *C. difficile* infection to develop new therapies.

10       Upon intestinal colonization, *C. difficile* produces toxins that disrupt epithelial barrier  
11 integrity and result in translocation of commensal bacteria into submucosal tissues. Impaired  
12 barrier integrity leads to downstream induction of a multi-faceted, robust, inflammatory  
13 response<sup>10,11</sup>. The innate immune response is essential for protection against *C. difficile* infection.  
14 Mice deficient in pathogen recognition receptor signaling pathways or innate immune cells exhibit  
15 increased bacterial translocation, damage to the epithelial barrier, and increased mortality  
16 following *C. difficile* infection<sup>12-16</sup>. Conversely, proinflammatory mediators can simultaneously  
17 exacerbate tissue damage and promote *C. difficile* expansion to hinder recovery<sup>16-18</sup>. In support  
18 of these animal studies, elevated fecal and serum proinflammatory cytokine levels are associated  
19 with increased disease severity in patients<sup>19-21</sup>. Together, these findings highlight the complexity  
20 of the host response and demonstrate the need to fundamentally understand the timing and  
21 context of intestinal inflammation as a driver of *C. difficile* pathogenesis. To begin to address the  
22 contribution of the host proinflammatory immune response in promoting disease severity during  
23 *C. difficile* infection, elevated expression of intestinal inflammatory mediators was established in  
24 mice *a priori* *C. difficile* challenge and the disease severity following subsequent infection was  
25 investigated.

1 Interleukin-10 (IL-10) is a broad immunoregulatory cytokine that negatively regulates  
2 commensal bacteria-driven immune activation at steady-state<sup>22-24</sup>. Intestinal expression of IL-10  
3 is critical for maintaining intestinal homeostasis as mice deficient in the *Il10* gene develop  
4 microbiota-dependent spontaneous colitis characterized by chronic activation of inflammatory  
5 mediators that are also associated with *C. difficile* pathogenesis<sup>25-27</sup>. Thus, *Il10*<sup>-/-</sup> mice, a widely  
6 used model of intestinal immune dysregulation, offer the opportunity to decouple intestinal  
7 inflammation from infection to study the causative nature of inflammatory mediators in *C. difficile*  
8 pathogenesis<sup>28</sup>.

9 In this report, we demonstrate that pre-existing intestinal immune activation, e.g.  
10 expression of proinflammatory cytokines driven by loss of IL-10 signaling, reduces susceptibility  
11 to *C. difficile* infection. Host protective immunity was independent of changes in *C. difficile* burden,  
12 toxin production, or the microbiota. The protective capacity of IL-10-deficient immune activation  
13 was dependent on IL-22 production enhancing early host defenses against *C. difficile* infection.

14

## 15 **Results**

### 16 **IL-10 deficiency decreases susceptibility to acute *C. difficile* infection**

17 At steady-state, IL-10 maintains intestinal homeostasis by negatively regulating commensal  
18 bacteria-driven expression of proinflammatory cytokines. In the context of *C. difficile* infection,  
19 many of these proinflammatory cytokines correlate with increased disease severity. However, it  
20 is unclear whether the inflammatory profile associated with infection emerges following *C. difficile*-  
21 mediated tissue damage or if it proactively drives pathology and worsens disease<sup>20,21</sup>. To address  
22 this question, intestinal inflammation was induced independently of *C. difficile* infection using the  
23 murine *Il10*<sup>-/-</sup> spontaneous colitis model and the impact of constitutive inflammation on *C. difficile*  
24 disease severity was examined. Cohoused *Il10*<sup>-/-</sup> and littermate *Il10* heterozygous mice (*Il10*<sup>HET</sup>)  
25 were treated with a broad-spectrum antibiotic cocktail in their drinking water to induce  
26 susceptibility to *C. difficile* and mimic the microbiota dysbiosis observed in patients at high risk for

1 contracting *C. difficile*. antibiotic-treated *Il10<sup>HET</sup>* mice, exhibited peak disease severity within 48  
2 hours of infection as measured by a disease score that measures weight loss, body temperature,  
3 diarrhea, and lethargy (Fig. 1A), and approximately 75% mortality rate (Fig. 1B). In contrast, *Il10<sup>-/-</sup>*  
4 mice experienced reduced disease severity at 2 days post infection (p.i.) (Fig. 1A) and were less  
5 likely to succumb to acute *C. difficile* infection compared to *Il10<sup>HET</sup>* mice (Fig. 1B).

6 *Il10<sup>-/-</sup>* mice challenged with pathogenic *Escherichia coli*, *Salmonella typhimurium*,  
7 *Citrobacter rodentium*, *Toxoplasma gondii*, or *Candida albicans* all display improved pathogen  
8 clearance via enhanced phagocytic mechanisms by innate immune cells<sup>29-33</sup>. Thus, *C. difficile*  
9 burden was measured at day 1 and 2 p.i. No difference in *C. difficile* burden was observed in the  
10 cecal content of *Il10<sup>HET</sup>* and *Il10<sup>-/-</sup>* mice at days 1 (Fig. 1C) or 2 p.i. (Fig. 1D). Further, *C. difficile*  
11 toxin activity in the cecal content of *Il10<sup>HET</sup>* and *Il10<sup>-/-</sup>* mice was similar at day 2 p.i. as measured  
12 by an *in vitro* cell rounding assay (Fig. 1E). Together, these data indicate that loss of IL-10  
13 augments host immunity following *C. difficile* infection but does not alter establishment of infection  
14 or production of toxins, the primary virulence factors of *C. difficile*.

15 Intestinal inflammation and subsequent onset of spontaneous colitis in *Il10<sup>-/-</sup>* mice varies  
16 between vivaria and is dependent on the microbiota<sup>25,26</sup>. To test the rigor of the observed  
17 phenotype in *C. difficile* infected *Il10<sup>-/-</sup>* mice, complimentary experiments with cohoused wild-type  
18 C57BL/6 and *Il10<sup>-/-</sup>* mice were conducted in an independent animal facility. In agreement with our  
19 studies in *Il10<sup>HET</sup>* mice, *Il10<sup>-/-</sup>* mice exhibited improved survival (Suppl. Fig. 1A) compared to  
20 cohoused C57BL/6 mice following *C. difficile* infection despite no difference in *C. difficile* burden  
21 (Suppl. Fig. 1B) or toxin production (Suppl. Fig. 1C), demonstrating the robustness of this  
22 phenotype.

23

#### 24 **Enhanced protection in *Il10<sup>-/-</sup>* mice is not driven by a distinct microbiota composition**

25 The composition of the microbiota impacts *C. difficile* pathogenesis through multiple direct and  
26 indirect mechanisms<sup>34</sup>, therefore cohoused littermate mice were used to normalize for this

1 variable. To test the null hypothesis that the microbiota composition between *Il10*<sup>HET</sup> and *Il10*<sup>-/-</sup>  
2 mice was indistinguishable, bacterial 16S rRNA marker gene profiling was conducted on cecal  
3 content from *Il10*<sup>HET</sup> and *Il10*<sup>-/-</sup> mice collected at day 2 post *C. difficile* or mock infection. Microbial  
4 community alpha diversity was not different between uninfected or infected *Il10*<sup>HET</sup> and *Il10*<sup>-/-</sup> mice  
5 (Fig. 2A). Comparison of 16S rRNA bacterial community profiles between *Il10*<sup>HET</sup> and *Il10*<sup>-/-</sup> mice  
6 by relative bacterial abundance revealed a bloom of amplicon sequence variants (ASVs) identified  
7 as *C. difficile* in both *Il10*<sup>HET</sup> and *Il10*<sup>-/-</sup> infected mice compared to uninfected mice, however the  
8 relative abundance composition between infected groups was similar (Fig. 2B). Beta diversity  
9 comparisons between samples by unsupervised hierarchical clustering (Fig. 2C), unweighted  
10 UniFrac distances (Fig. 2D), or PERMANOVA analysis (Suppl. Table 1) did not lead us to reject  
11 the null hypothesis that there was no microbial community level differences between *Il10*<sup>HET</sup> and  
12 *Il10*<sup>-/-</sup> mice at day 2 following mock infection or *C. difficile* infection. A linear regression model was  
13 used to identify individual ASVs that correlate with *Il10*<sup>HET</sup> and *Il10*<sup>-/-</sup> phenotypes. The linear model  
14 readily detected *C. difficile* as significantly enriched in infected mice compared to uninfected mice  
15 but failed to identify an ASV significantly different between the microbiota of infected *Il10*<sup>HET</sup> and  
16 *Il10*<sup>-/-</sup> mice (Suppl. Fig. 2A,B).

17 In a validation cohort, 16S rRNA marker gene profiling was conducted on fecal pellets  
18 collected from C57BL/6 and *Il10*<sup>-/-</sup> mice prior to cohousing (day -64 p.i.), throughout cohousing,  
19 the start of antibiotic treatment (day -6 p.i.), and on the day of infection (day 0 p.i.). Prior to  
20 cohousing, *Il10*<sup>-/-</sup> mice exhibit a distinct microbiota (Suppl. Fig. 3A, Suppl. Table 2). Cohousing  
21 shifted the microbiota of C57BL/6 mice to resemble the microbiota of *Il10*<sup>-/-</sup> mice as determined  
22 by unweighted UniFrac distance analysis (Suppl. Fig. 3A), relative bacterial genera abundance  
23 (Suppl. Fig. 3B), unsupervised hierarchical clustering (Suppl. Fig. 3C), and PERMANOVA  
24 analysis (Suppl. Table 2). Antibiotic treatment between day -6 and 0 p.i. significantly reduced the  
25 alpha diversity (Suppl. Fig. 3D) and shifted the microbiota of both C57BL/6 and *Il10*<sup>-/-</sup> mice, but  
26 no difference between groups was observed (Suppl. Table 2). To identify specific ASVs that were

1 differentially abundant between cohoused C57BL/6 and *Il10*<sup>-/-</sup> mice, a LEfSe comparison was  
2 conducted. Several ASVs were differentially abundant within the microbiota of C57BL/6 and *Il10*<sup>-/-</sup>  
3 mice prior to cohousing (Suppl. Fig. 3E). However, following cohousing and antibiotic treatment,  
4 none of these differentially abundant ASVs remained (Suppl. Fig. 3E). Together, these microbial  
5 profiling data support the conclusion that the differential outcome observed in antibiotic-treated  
6 IL-10 sufficient and deficient hosts following *C. difficile* infection cannot be explained by  
7 community level differences in the microbiota.

8

9 ***Il10*<sup>-/-</sup> and *Il10*<sup>HET</sup> mice exhibit comparable induction of innate immunity following *C. difficile***  
10 **infection.**

11 No differences in *C. difficile* colonization, toxin production, or microbiota composition were  
12 observed between infected *Il10*<sup>HET</sup> and *Il10*<sup>-/-</sup> mice to account for enhanced protection in *Il10*<sup>-/-</sup>  
13 mice, therefore potential immune-mediated mechanisms were assessed. Induction of IL-10 is an  
14 effective strategy employed by some enteric pathogens to dampen the host immune response to  
15 infection<sup>29,30,35-37</sup>. *C. difficile*-derived flagellin, surface layer proteins, and toxin (TcdB) can all  
16 induce macrophages, monocytes, and dendritic cells to produce IL-10 *in vitro*<sup>38-40</sup>. Indeed,  
17 C57BL/6 mice infected with *C. difficile* have elevated IL-10 protein in the cecal tissue at day 2 p.i.  
18 (Fig. 3A). The broad immunosuppressive functions of IL-10 include inhibition of granulocyte  
19 infiltration into mucosal tissue and limiting expression of type-1 and type-17 cytokines,  
20 components of the immune response that promote protective immunity following *C. difficile*  
21 infection<sup>41-43 44,45</sup>. First protein levels of lipocalin-2 (LCN-2), an established marker of intestinal  
22 inflammation<sup>46</sup>, were measured in the cecal content of antibiotic-treated uninfected and day 2 p.i.  
23 *Il10*<sup>-/-</sup> and *Il10*<sup>HET</sup> mice<sup>46</sup>. LCN-2 levels increased to approximately the same concentration in both  
24 groups by day 2 p.i (Fig. 3B). To thoroughly assess the quality of the innate immune response to  
25 acute *C. difficile* infection, *Il10*<sup>-/-</sup> and *Il10*<sup>HET</sup> mice were sacrificed at day 2 p.i. and recruitment of  
26 innate immune cells and induction of proinflammatory cytokines were assessed. Both infected

1 *Il10*<sup>HET</sup> and *Il10*<sup>-/-</sup> mice exhibited a robust induction of the innate immune response compared to  
2 antibiotic-treated, uninfected, control mice (Fig. 3). However, no differences in the frequency  
3 (Suppl Fig. 4A,B) or total numbers of infiltrating neutrophils (Fig. 3C), monocytes (Fig. 3D), or  
4 eosinophils (Fig. 3E) were observed. *Il10*<sup>-/-</sup> and *Il10*<sup>HET</sup> mice at day 2 p.i. exhibited comparable  
5 elevated gene expression of *Ifng* and *Il22* (Fig. 3F) as well as downstream host defense genes  
6 *Nos2* and *Reg3g* in the colon (Fig. 3G). IFN- $\gamma$  and IL-22 protein concentrations in cecal tissue  
7 homogenates were also comparable (Fig. 3H). Type-2 cytokines (IL-5, IL-13, IL-33) associated  
8 with eosinophil activation and protection during *C. difficile* infection<sup>15,38,39</sup>, were not significantly  
9 different in the cecum *Il10*<sup>-/-</sup> and *Il10*<sup>HET</sup> mice at day 2 p.i. (Fig. 3I). Finally, no difference in  
10 proinflammatory cytokines (IL-1 $\beta$ , IL-6, IL-17a, IL-27, GM-CSF) reported to modulate *C. difficile*  
11 pathogenesis<sup>16,40-44</sup>, or chemokines (CXCL1, CXCL2, CCL2) involved in neutrophil and monocyte  
12 recruitment was observed in the cecal tissue homogenates of *Il10*<sup>-/-</sup> and *Il10*<sup>HET</sup> mice at day 2 p.i.  
13 (Suppl. Fig. 4C-D). Collectively, these data indicate the magnitude or quality of the innate immune  
14 response in *Il10*<sup>-/-</sup> mice following *C. difficile* infection is not driving the attenuated disease  
15 phenotype.

16

### 17 **Loss of IL-10 signaling prior to *C. difficile* infection drives immune activation in the** 18 **intestine and augments protective immunity**

19 In contrast to the comparable immune responses observed in *C. difficile* infected *Il10*<sup>-/-</sup> and *Il10*<sup>HET</sup>  
20 mice, antibiotic-treated uninfected *Il10*<sup>-/-</sup> mice at day 2 post mock infection had higher levels of  
21 LCN-2 in the cecal content (Fig. 3B.) and increased expression of IL-22 and IFN- $\gamma$ -dependent  
22 effector molecules (Fig. 3F) in the large intestine compared to antibiotic-treated uninfected *Il10*<sup>HET</sup>  
23 mice. Moreover, antibiotic-treated *Il10*<sup>-/-</sup> mice at day 0 p.i. displayed elevated immune activation  
24 in the large intestine compared to *Il10*<sup>HET</sup> mice as determined by increased frequency (Fig. 4A)  
25 and total numbers (Fig. 4B) of infiltrating neutrophils in the large intestine as well as elevated



1 expression of proinflammatory immune defense genes (*Il22*, *Ifng*, *Reg3g*, *Nos2*) (Fig. 4C), as has  
2 been previously reported<sup>47,48</sup>. These results support the hypothesis that pre-existing immune  
3 activation, not the magnitude of the immune response following infection, confers protective  
4 immunity in *Il10*<sup>-/-</sup> mice.

5 To determine whether loss of IL-10 signaling prior to infection and subsequent immune  
6 activation augments protection following *C. difficile* infection, IL-10 signaling was selectively  
7 blocked in C57BL/6 mice starting either three weeks prior to infection or once on the day of  
8 infection and survival was assessed. Antibody-mediated blockade of the IL-10-specific receptor  
9 IL-10R1 ( $\alpha$ IL10R1) administered once a week for at least 3 weeks abrogates IL-10 signaling and  
10 replicates the intestinal inflammation observed in germline *Il10*<sup>-/-</sup> mice<sup>49</sup>. C57BL/6 mice that  
11 received weekly  $\alpha$ IL10R1 treatment starting 3 weeks prior to infection exhibited a comparable  
12 survival to *Il10*<sup>-/-</sup> mice and significantly improved survival compared to C57BL/6 mice administered  
13  $\alpha$ IL10R1 at day 0 p.i. (Fig. 4D). These data support the hypothesis that IL-10 inhibits basal  
14 activation of intestinal immune defense genes prior to infection thereby rendering the host more  
15 susceptible to *C. difficile* infection.

16

### 17 **IL-22 is critical for host defense against *C. difficile* infection in *Il10*<sup>-/-</sup> mice**

18 Inhibition of IL-10 signaling limits *C. difficile* pathogenesis only if initiated weeks prior to infection  
19 (Fig. 4D). Further, *Il10* deficiency leads to enhanced colonic *il22* and *ifng* expression in uninfected  
20 mice (Fig 4C). Both IL-22 and IFN- $\gamma$  are critical in mounting a protective innate immune response  
21 during acute *C. difficile* infection<sup>13,14,50</sup>. These observations suggest immune activation prior to  
22 infection promotes improved survival in *Il10*<sup>-/-</sup> mice. To determine the relative contribution of these  
23 cytokine pathways to host protection in *Il10*<sup>-/-</sup> mice, *Il22* or *Tbx21* (the gene that encodes T-bet, a  
24 master transcription factor that regulates IFN- $\gamma$  production) was genetically ablated in *Il10*<sup>-/-</sup> mice.  
25 Following *C. difficile* infection, *Il10.Tbx21* double knockout (dKO) mice exhibited comparable  
26 survival to *Il10*<sup>-/-</sup> mice, suggesting the IFN- $\gamma$  pathway was dispensable for protection in *Il10*<sup>-/-</sup> mice

1 (Fig. 5A). In contrast, *Il10.II22* dKO mice were acutely susceptible to *C. difficile* infection (Fig. 5A).  
2 To confirm the dependence of IL-22 signaling for host protection in an IL-10 deficient setting,  
3 cohoused C57BL/6 or *Il10*<sup>HET</sup> mice, *Il10*<sup>-/-</sup>, *Il22*<sup>-/-</sup>, *Il10.II22* dKO, and *Il10r2*<sup>-/-</sup> mice (IL-10R2 is the  
4 shared receptor subunit necessary for both IL-10 and IL-22 signaling) were pre-treated with  
5 antibiotics and infected with *C. difficile*. Genetic ablation of IL-22 signaling in an IL-10-deficient  
6 setting (*Il10.II22* dKO and *Il10r2*<sup>-/-</sup> mice) led to significantly increased disease morbidity at day 2  
7 p.i. (Fig. 5B), and mortality compared to *Il10*<sup>-/-</sup> mice (Fig. 5C). Collectively, these data support the  
8 conclusion that loss of IL-10 signaling leads to activation of IL-22 dependent host defense  
9 mechanisms that limit *C. difficile* pathogenesis.

10

## 11 Discussion

12 *C. difficile* infection induces a robust innate inflammatory response that has been extensively  
13 studied in the context of pathogenesis. Here, we employed *Il10*<sup>-/-</sup> mice to decouple constitutive  
14 intestinal inflammation from *C. difficile* infection-induced inflammation and determine their  
15 respective roles in pathogen defense. Collectively, our data support the conclusion that the  
16 absence of IL-10 signaling elevates host defenses prior to infection leading to reduced *C. difficile*  
17 pathogenesis in an IL-22 dependent manner. These results implicate a novel and deleterious role  
18 for IL-10 in dampening the IL-22 response during enteric *C. difficile* infection.

19 Previous work by Kim *et al.* assessed IL-10 in the context of *C. difficile* infection and  
20 observed severe histopathology in *C. difficile* infected *Il10*<sup>-/-</sup> mice infected at day 7 p.i. compared  
21 to cohoused C57BL/6 mice that developed mild *C. difficile* disease (10-15% weight loss; 100%  
22 survival in wild-type mice)<sup>51</sup>. The data in this report complements this finding and investigates the  
23 role of IL-10 in the acute response to severe *C. difficile* infection (20-30% weight loss; 25-50%  
24 survival in C57BL/6 mice). Together, these studies support a model where basal immune  
25 activation prior to infection can limit severe acute pathogenesis. However, prolonged *Il10*

1 deficiency during a milder form of disease tips the balance toward inflammation-driven tissue  
2 immunopathology.

3         Despite the protective capacity of intestinal inflammation reported in this study in the  
4 context of *Il10* deficiency, expression of proinflammatory molecules does not uniformly limit *C.*  
5 *difficile* disease. Notably, *Il10*<sup>-/-</sup> mice are also a widely used model of inflammatory bowel disease  
6 (IBD), a well-appreciated risk factor for *C. difficile* disease<sup>8,52</sup>. Due to its multifactorial nature,  
7 however, clinical reports that link IBD to *C. difficile* are not able to differentiate what features of  
8 IBD drive increased *C. difficile* disease severity<sup>52</sup>. Research investigating the connection between  
9 IBD and *C. difficile* has employed mice treated with dextran sodium sulfate (DSS), a model of  
10 chemically-induced colitis, to disentangle the role of proinflammatory immune components in  
11 pathogenesis. DSS-treated mice exhibit increased susceptibility to *C. difficile* infection.<sup>53</sup> and  
12 Saleh *et al.* demonstrated that IL-17 competent CD4<sup>+</sup> T<sub>H</sub>17 cells activated by DSS colitis were  
13 sufficient to increase susceptibility to *C. difficile* infection in non-DSS treated mice<sup>16</sup>. This work  
14 identifies induction of IL-17 during IBD as an inflammatory pathway that promotes *C. difficile*  
15 disease.

16         In the context of the *C. difficile* infection, the IL-23/IL-22/IL-17 axis has a nuanced role in  
17 pathogenesis. Genetic ablation of IL-23, a cytokine upstream of IL-17, protects mice from severe  
18 *C. difficile* infection<sup>17</sup> while mice deficient in IL-22, which is also directly downstream of IL-23, are  
19 acutely susceptible to infection<sup>13,54</sup>. Further, wild-type mice that receive rIL-22 treatment prior to  
20 *C. difficile* challenge are protected from severe infection<sup>13</sup>. Altogether, these observations, along  
21 with the results presented here, support a protective role for elevated IL-22 production. At the  
22 same time, induction of the IL-23 proinflammatory axis in the absence of IL-22, or in favor of IL-  
23 17 production, could drive more severe disease. Multiple IL-22 dependent mechanisms that  
24 mediate protection against *C. difficile* infection have been described. Hasegawa *et al.*  
25 demonstrated the induction of complement proteins via IL-22 signaling on hepatocytes is required  
26 to limit non-*C. difficile* bacterial translocation during severe *C. difficile* infection<sup>13</sup>. In addition to

1 this systemic role for IL-22, a more recent study demonstrated a role for IL-22 signaling in  
2 modulation of intestinal epithelial glycosylation to enable growth of bacterial consumers of  
3 succinate, a crucial metabolite for *C. difficile* growth<sup>55</sup>. IL-22 also acts on intestinal epithelial cells  
4 to induce expression of genes that encode antimicrobial peptides, including RegIII $\gamma$ , lipocalin-2,  
5 and calprotectin<sup>56-58</sup>, that limit damage of adherent or mucosal-associated commensal bacteria  
6 to the epithelium<sup>56,57</sup> the latter of which has been associated with host protection against *C.*  
7 *difficile*<sup>59</sup>. In support of this, Gunesequera *et al.* showed that *Il10*<sup>-/-</sup> mice exhibited enriched  
8 expression of these same IL-22 dependent antimicrobial genes, all of which were uniquely lost in  
9 *Il10.II22* dKO mice<sup>60</sup>. Thus, elevated IL-22 expression at the time of *C. difficile* infection, as  
10 observed in *Il10*<sup>-/-</sup> mice, positions the host to limit toxin-mediated destruction of the epithelial  
11 barrier.

12 Immune activation in IL-10 deficient hosts disrupts homeostasis at steady-state but is also  
13 beneficial in the context of an acute *C. difficile* infection by elevating baseline defense  
14 mechanisms prior to infection. This concept of immunological tuning prior to infection has been  
15 previously observed with commensal bacteria providing tonic signaling to maintain antiviral  
16 defenses in a poised state of readiness to rapidly respond upon viral infection<sup>61-63</sup>. Thus, the  
17 trade-off of constitutive intestinal IL-10 expression is diminished basal activation of immune  
18 defense genes and therefore a decreased capacity of the host to respond to pathogen challenge.  
19 Understanding the dynamics of this biological balancing act could help develop therapies that  
20 selective or transiently targeting the protective components of immune activation in at-risk patients  
21 while avoiding deleterious side effects of prolonged inflammation.

22

## 23 **Materials and Methods**

24 **Mice.** Four to six-week old wild-type C57BL/6J, *Il10*<sup>-/-</sup>, *Tbx21*<sup>-/-</sup>, *Il10rb*<sup>-/-</sup> mice were purchased from  
25 the Jackson Laboratory. *Il22*<sup>-/-</sup> mice were provided by R. Flavell (Yale University). All knockout  
26 mouse strains were derived on a C57BL/6 background. All mice were bred and maintained in

1 autoclaved cages under specific pathogen-free conditions at the University of Pennsylvania. All  
2 experiments with cohoused C57BL/6 and *I110*<sup>-/-</sup> mice were done at Memorial Sloan Kettering  
3 Cancer Center. *I110I122* dKO and *I110.Tbx21* dKO mice were generated by breeding *I110*<sup>-/-</sup> mice  
4 with *I122*<sup>-/-</sup> and *Tbx21*<sup>-/-</sup> mice, respectively. The presence of *Helicobacter spp.*, a bacterial genus  
5 sufficient to trigger intestinal inflammation in *I110*<sup>-/-</sup> mice by three months of age<sup>64</sup>, was confirmed  
6 by PCR in the feces of all breeder *I110*<sup>-/-</sup> mice and *I110*<sup>-/-</sup>-derived mouse strains. Sex- and age-  
7 matched control mice were used in all experiments according to institutional guidelines for animal  
8 care. All animal procedures were approved by the Institutional Animal Care and Use Committee  
9 of the University of Pennsylvania and Memorial Sloan Kettering Cancer Center.

10

11 **Antibiotic Pretreatment, *C. difficile* infection , and Mouse Monitoring.** Mice were cohoused  
12 for 3 weeks prior to antibiotic treatment and then supplemented with metronidazole (0.25 g/l),  
13 neomycin (Sigma) (0.25 g/l), and vancomycin (Novaplus) (0.25 g/l) in drinking water for 3 days.  
14 One day following cessation of antibiotic water, mice received 200 mg of clindamycin (Sigma) by  
15 i.p. injection. Twenty-four hours later, mice received approximately 400 *C. difficile* spores  
16 (VPI10463 strain ATCC #43255) via oral gavage. For antibody-mediated blockade experiments,  
17 mice received 1 mg of  $\alpha$ IL10R1 antibody (clone 1B1.3A, Bio X Cell) or mouse IgG1 isotype control  
18 (clone MOPC-21, Bio X Cell) i.p. weekly starting either 3 weeks prior to infection or at day of  
19 infection. After infection, mice were monitored and scored for disease severity by four parameters:  
20 weight loss (> 95% of initial weight = 0, 95%– 90% initial weight = 1, 90%–80% initial weight = 2,  
21 < 80% = 3), surface body temperature (> 32°C = 0, 32°C–30.5°C = 1, 30.5°C–29°C = 2, < 29°C =  
22 3), diarrhea severity (formed pellets = 0, loose pellets = 1, liquid discharge = 2, no pellets/caked  
23 to fur = 3), morbidity (score of 1 for each symptoms with a maximum score of 3; ruffled fur,  
24 hunched back, lethargy, ocular discharge). Mice that exhibited severe disease, defined as a  
25 surface body temperature below 29.5°C or weight loss in excess of 30%, were humanely  
26 euthanized.

1

2 **C. difficile Quantification.** Fecal pellets or cecal content were resuspended in deoxygenated  
3 PBS, and ten-fold serial dilutions were plated anaerobically at 37°C on brain-heart infusion agar  
4 supplemented with yeast extract, L-cysteine, D-cycloserine, cefoxitin, and taurocholic acid  
5 (CCBHIS-TA) and colony-forming units (CFUs) were enumerated 24 hours later. Prior to infection,  
6 fecal samples from mice were cultured overnight in CCBHIS-TA liquid broth, then serially diluted  
7 and grown for 24 hours on CCBHIS-TA plates to ensure that mice did not harbor endogenous *C.*  
8 *difficile* in their microbiota. Supernatants from the cecal or fecal content were obtained after  
9 centrifugation for cytotoxicity assays and LCN-2 ELISA (Bethyl Labs).

10

11 **C. difficile Toxin Cytotoxicity Assay.** Vero cells were seeded in 96-well plates at  $1 \times 10^4$   
12 cells/well and incubated for 24 hours at 37°C in 5% CO<sub>2</sub>. Cecal or fecal supernatants were added  
13 in ten-fold dilutions to the Vero cells (100 µL/well) and incubated overnight prior to removal, rinsing  
14 with PBS, and replacement with fresh media. The presence of *C. difficile* toxins A and B was  
15 confirmed by neutralization with antitoxin antisera (Techlab, Blacksburg, VA). The data are  
16 expressed as the log<sub>10</sub> reciprocal value of the last dilution where cell rounding was observed.  
17 Cell morphological changes were observed after 18 hours using a Nikon inverted microscope.  
18 The cytopathic effect was determined as rounded cells in comparison to the negative control  
19 wells.

20

21 **16S rRNA sequencing.** Cecal content was collected from uninfected mice and mice infected with  
22 *C.difficile* at 2 dpi. DNA was extracted using the Qiagen MagAttract Power Microbiome kit  
23 DNA/RNA kit (Qiagen, catalog no. 27500-4-EP) and used for rRNA sequencing and *Helicobacter*  
24 *spp.* PCR. Genus-specific PCR was conducted on purified bacterial DNA from feces of *Il10<sup>-/-</sup>*  
25 breeder mice and The V4-V5 region of the 16S rRNA gene was amplified from each sample using  
26 the dual indexing sequencing strategy as described previously<sup>65</sup>. Sequencing was done on the

1 Illumina MiSeq platform. The V4-V5 region of the 16S rRNA gene was sequenced and  
2 demultiplexed using the fqgrep tool. Data were imported into QIIME2 (v. 2020.2)<sup>66</sup> and denoised  
3 using the DADA2 plugin<sup>67</sup>. For data in Supplemental Figure 3, the fqgrep tool  
4 (<https://github.com/indraniel/fqgrep>) was used to demultiplex the sequences followed by  
5 denoising using the DADA2 (v. 1.14.1)<sup>67</sup> implementation in R (v. 3.6.3)<sup>68</sup>. Due to quality issues on  
6 the reverse reads, only the forward reads were used for denoising. Datasets were taxonomically  
7 classified in QIIME2 using the q2-feature-classifier<sup>69</sup> classify-sklearn naïve Bayes classifier with  
8 a newly generated classifier against Greengenes 13\_8 99% OTU sequences<sup>70</sup>. Phylogenetic  
9 trees were generated using mafft<sup>71</sup> and the q2-phylogeny plugin<sup>72</sup>. Data were then imported into  
10 R for further analyses with phyloseq (v. 1.30.0)<sup>73</sup> and visualization with ggplot2 (v. 3.3.0)<sup>74</sup>.  
11 Unweighted UniFrac<sup>75</sup> dissimilarity was calculated to generate PCoA plots and for creating  
12 dendrograms using the hclust function (stats package in R core, v. 3.6.3). Finally, a linear model  
13 was built using the lm() and padjust() functions (stats package, v. 3.6.3) as well as the tidyverse  
14 package (v. 1.3.0)<sup>76</sup>.

15

16 **Isolation of lamina propria cells and flow cytometry.** Single cell suspensions were obtained  
17 from the large intestine lamina propria compartment by longitudinally cutting the large intestine  
18 and washing out its contents in PBS. Intestinal tissues were incubated at 37°C under gentle  
19 agitation in stripping buffer (PBS, 5 mM EDTA, 1 mM dithiothreitol, 4% FCS, 10µg/mL  
20 penicillin/streptomycin) for 10 minutes to remove epithelial cells and then for another 20 minutes  
21 for the IEL. The tissue was digested with collagenase IV 1.5 mg/mL (500 U/mL) and DNase (20  
22 µg/mL) in complete media (DMEM supplemented w/ 10% FBS, 10 µg/mL penicillin/streptomycin,  
23 50 µg/mL gentamicin, 10 mM HEPES, 0.5 mM β-mercaptoethanol, 20 µg/mL L-glutamine) for 30  
24 minutes at 37°C under gentle agitation. Supernatants containing the lamina propria fraction were  
25 passed through a 100 µm then subsequently 40 µm cell strainer. After counting, cells were plated  
26 at 10<sup>6</sup> cells per well in 96-well round bottom plates and washed twice in 1x PBS before incubating

1 with a cell viability dye 20 minutes at room temperature (Invitrogen AQUA dye). After Fc blockade  
2 (anti-mouse CD16/32 TruStain, BioLegend), cells were stained using a standard flow cytometric  
3 staining protocol with fluorescently conjugated antibodies specific to CD3 $\epsilon$ , CD5, CD19, CD45,  
4 MHC-II, Siglec-F, Ly-6G, Ly6C, CD11b, and CD11c. Stained cells were kept in FACS buffer at  
5 4°C until run. Samples were acquired on an LSR-II flow cytometer (Becton Dickinson). Data were  
6 analyzed using FlowJo version 9.9.6 software. Cell populations were calculated from total cells  
7 per colon as a percentage of live CD45<sup>+</sup> cells.

8

9 **Cytokine and Chemokine Quantification.** Cecal tissue was homogenized in tissue extraction  
10 buffer with protease inhibitors for 1 minute by bead beating with steel beads. Homogenates were  
11 centrifuged at x10,000 rpm for 5 minutes and supernatants were collected and stored at -80° C.  
12 Supernatants containing protein were analyzed by Mouse Multiplex Luminex assay (Invitrogen)  
13 at the Human Immunology Core at University of Pennsylvania. Concentrations displayed as ng of  
14 analyte per gram of cecal tissue.

15

16 **Tissue RNA Isolation, cDNA Preparation, and qRT-PCR.** RNA was isolated from proximal  
17 colon tissue using mechanical homogenization and Trizol isolation (Invitrogen) according to the  
18 manufacturer's instructions. cDNA was generated using QuantiTect reverse transcriptase  
19 (QIAGEN). Quantitative RT-PCR was performed on cDNA using either TaqMan primers and  
20 probes or QuantiTect primers in combination with TaqMan PCR Master Mix (ABI) or SYBR Green  
21 chemistry and reactions were run on a RT-PCR system (QuantiStudio 6 Flex, Applied  
22 Biosystems). Gene expression is displayed as fold increase over antibiotic-pre-treated, uninfected  
23 control mice and was normalized to the *Hprt* gene.

24



1 **Statistical Analysis.** Results represent means  $\pm$  SEM. Statistical significance was determined  
2 by the unpaired t-test and log-rank test for survival curve. Statistical analyses were performed  
3 using Prism GraphPad software v6.0 (\*  $p < 0.05$ ; \*\*  $p < 0.01$ ; \*\*\*  $p < 0.001$ ).

#### 4 5 **Figure Legend**

#### 6 **Figure 1: Genetic ablation of *Il10* results in reduced susceptibility to *C. difficile* infection.**

7 Antibiotic-treated *Il10*<sup>-/-</sup> and *Il10*<sup>HET</sup> mice were inoculated with approximately 400 spores of *C.*  
8 *difficile* (VPI 10463 strain) and monitored daily for disease. **(A)** Disease score and **(B)** survival  
9 following infection. Data shown are a combination of five independent experiments (*Il10*<sup>-/-</sup>, n=23;  
10 *Il10*<sup>HET</sup>, n=25). **(C)** *C. difficile* burden in fecal pellets at day 1 p.i. **(D)** *C. difficile* burden and **(E)** *C.*  
11 *difficile* toxin levels in the cecal content at day 2 p.i. \*\* =  $p < 0.01$ . Statistical significance was  
12 calculated by a log-rank test.

#### 13 14 **Figure 2: *C. difficile*-infected *Il10*<sup>-/-</sup> mice and *Il10*<sup>HET</sup> mice exhibit a similar microbiota**

15 **composition.** Antibiotic-treated uninfected and *C. difficile* infected *Il10*<sup>-/-</sup> mice and *Il10*<sup>HET</sup> mice  
16 were sacrificed at day 2 p.i. and cecal content was processed for 16s rRNA bacterial gene  
17 profiling. **(A)** Microbial alpha diversity as determined by the Shannon diversity index. **(B)** Relative  
18 abundance of top 15 bacterial ASVs. Bar plot is displayed at the genus level except for orange  
19 bars that represent an ASV aligning to *C. difficile*. **(C)** Dendrogram representation of intestinal  
20 microbial communities using unsupervised hierarchical clustering of unweighted UniFrac  
21 distances to identify similarities between samples. **(D)** Unweighted UniFrac principal coordinate  
22 analysis plot of 16S bacterial rRNA ASVs.

#### 23 24 **Figure 3: *Il10*<sup>-/-</sup> and *Il10*<sup>HET</sup> mice exhibit a comparable induction of the innate immune**

25 **response following acute *C. difficile* infection.** **(A)** IL-10 protein levels in the cecal tissue  
26 homogenates of antibiotic-treated uninfected and day 2 p.i. C57BL/6 mice. **(B-H)** *Il10*<sup>-/-</sup> and *Il10*<sup>HET</sup>

1 mice were inoculated with approximately 400 spores of *C. difficile* (VPI 10463 strain) or mock  
2 infected and sacrificed two days later. **(B)** LCN-2 protein levels in the cecal supernatants. **(C-E)**  
3 Large intestine lamina propria cells were harvested and assessed by flow cytometry for **(C)**  
4 neutrophils (CD11b<sup>+</sup>, Ly6G<sup>+</sup>), **(D)** monocyte (CD11b<sup>+</sup>, Ly6C<sup>+</sup>, Ly6G<sup>-</sup>) and **(E)** Eosinophil (SSC<sup>Hi</sup>,  
5 CD11b<sup>+</sup>, Siglec-F<sup>+</sup>) recruitment. **(F)** Fold induction of *Ifng*, *Il22* and **(G)** IFN- $\gamma$  and IL-22 effector  
6 molecules (*Nos2* and *Reg3g*) in the colon at day 2 p.i. relative to uninfected *Il10*<sup>HET</sup> mice and  
7 normalized to *Hprt*. **(H)** IFN- $\gamma$ , IL-22, and **(I)** type-2 associated cytokine protein levels in the cecal  
8 tissue homogenate. Data shown are a combination of two independent experiments (uninfected  
9 *Il10*<sup>-/-</sup>, n=7; uninfected *Il10*<sup>HET</sup>, n=6; day 2 infected *Il10*<sup>-/-</sup>, n=8; uninfected *Il10*<sup>HET</sup>, n=7). Data shown  
10 are mean  $\pm$  SEM. \* = p<0.05. \*\* = p<0.01. Statistical significance was calculated by an unpaired  
11 t-test.

12

13 **Figure 4: Loss of IL-10 signaling enhances intestinal immune activation prior to infection**  
14 **and decreases susceptibility to acute *C. difficile* infection.** Antibiotic-treated uninfected and  
15 *Il10*<sup>-/-</sup> mice and *Il10*<sup>HET</sup> mice were sacrificed at the day of infection (prior to inoculation). **(A)**  
16 Frequency of neutrophils and monocytes in the large intestine lamina propria. FACS plots gated  
17 on live, CD45<sup>+</sup>, Non-T, Non-B cells, Siglec-F<sup>neg</sup>, CD11b<sup>+</sup> cells. **(B)** Total number of neutrophils  
18 and monocytes in the large intestine lamina propria. Data is a combination representative of two  
19 independent experiments. *Il10*<sup>-/-</sup>, n=8; *Il10*<sup>HET</sup>, n=9. **(C)** Fold induction of type-1 and type-17  
20 associated effector molecules in the colon of antibiotic-treated, uninfected *Il10*<sup>-/-</sup> mice relative to  
21 antibiotic treated uninfected *Il10*<sup>HET</sup> mice and normalized to *Hprt*. Data is a combination  
22 representative of three independent experiments. *Il10*<sup>-/-</sup>, n=12; *Il10*<sup>HET</sup>, n=13. Data shown are  
23 mean  $\pm$  SEM. **(D)** C57BL/6 mice were cohoused with *Il10*<sup>-/-</sup> mice for two weeks then were  
24 administered anti-IL10R1 or isotype control (Rat IgG1) by i.p. injection weekly for three weeks  
25 prior to infection or received a single dose of anti-IL10R1 on the day of *C. difficile* infection and

1 assessed for survival following infection. Data are a combination of two independent experiments  
2 (n=8 per group). \* = p < 0.05. Statistical significance was calculated by an unpaired t-test or a log-  
3 rank test.

4

5 **Figure 5. IL-22 signaling is required for protection against *C. difficile* infection in *Il10*<sup>-/-</sup> mice.**

6 **(A)** Cohoused *Il10*<sup>-/-</sup>, *Il10.II22* dKO and *Il10.Tbx21* dKO mice were pre-treated with antibiotics and  
7 inoculated with approximately 400 spores of *C. difficile* (VPI 10463 strain) and assessed for  
8 survival following infection. Survival curve is a combination of three independent experiments.  
9 (*Il10*<sup>-/-</sup>, n=7; *Il10.II22* dKO, n=12; *Il10.Tbx21* dKO, n=14). **(B)** Disease severity at day 2 p.i. and  
10 **(C)** survival curve of cohoused C57BL/6 or *Il10*<sup>HET</sup> (wild-type - WT), *Il10*<sup>-/-</sup>, *Il10r2*<sup>-/-</sup>, *Il10*<sup>-/-</sup>, *Il22*<sup>-/-</sup>,  
11 and *Il10.II22* dKO mice following *C. difficile* infection. Data shown are a combination of four  
12 independent experiments (WT, n=12; *Il10*<sup>-/-</sup>, n=14; *Il10r2*<sup>-/-</sup>, n=14; *Il22*<sup>-/-</sup>, n=16; *Il10.II22* dKO, n=12).  
13 \* = p<0.05. Statistical significance was calculated by an unpaired t-test or a log-rank test.

14

15 **Supplementary Figure 1: *Il10*<sup>-/-</sup> mice are less susceptible to *C. difficile* infection compared**

16 **to cohoused C57BL/6 mice. (A)** *Il10*<sup>-/-</sup> and C57BL/6 (B6) mice were inoculated with  
17 approximately 400 spores of *C. difficile* (VPI 10463 strain) and assessed for survival following  
18 infection. Survival curve is a combination of four independent experiments (*Il10*<sup>-/-</sup>, n=31; C57BL/6,  
19 n=33). **(B)** *C. difficile* burden and **(C)** toxin levels in the cecal content at days 2 and 4 p.i. \*\* =  
20 p<0.01. Statistical significance was calculated by a log-rank test.

21

22 **Supplementary Figure 2: Identification of individual ASVs that correlate with *C. difficile*-**

23 **infected *Il10*<sup>-/-</sup> mice and *Il10*<sup>HET</sup> mice. (A)** Linear modeling of ASV abundances in *Il10*<sup>HET</sup> and  
24 *Il10*<sup>-/-</sup> cecal microbiotas fail to identify differences in microbiota compositions. **(A)** Abundance of  
25 top 3 ASVs correlating significantly with experimental groups were plotted. **(B)** Model

1 comparisons for experimental groups show significantly different ASV abundances that correlate  
2 with group phenotype. \* $p < 0.05$ , \*\* $p < 0.01$ , \*\*\* $p < 0.001$ .

3

4 **Supplementary Figure 3: Cohousing *Il10<sup>-/-</sup>* mice with C57BL/6 mice assimilates their**

5 **microbiota prior to infection.** Fecal pellets were collected from *Il10<sup>-/-</sup>* and wild-type mice starting

6 prior to cohousing (day -64 p.i.), following cohousing (day -55, -47 p.i.), the start of antibiotic

7 treatment (day -6 p.i.), and the day of infection (day 0 p.i.). Fecal pellets were processed for 16S

8 rRNA bacterial gene profiling. **(A)** Unweighted UniFrac principal coordinate analysis plot of 16S

9 bacterial rRNA ASVs. **(B)** Relative abundance of top 15 bacterial ASVs. **(C)** Dendrogram

10 representation of intestinal microbial communities using unsupervised hierarchical clustering of

11 unweighted UniFrac distances to identify similarities between samples. **(D)** Microbial alpha

12 diversity as determined by the Shannon diversity index. **(E)** LEfSe analysis identifying significantly

13 differentially abundance ASVs prior to cohousing (day -64 p.i.), prior to antibiotics (day -6 p.i.),

14 and at the day of infection (day 0 p.i.). \*\* =  $p < 0.01$ .

15

16 **Supplementary Figure 4: *Il10<sup>-/-</sup>* and *Il10<sup>HET</sup>* mice exhibit comparable granulocyte infiltration**

17 **induction of proinflammatory cytokines and chemokines following acute *C. difficile***

18 **infection.** *Il10<sup>-/-</sup>* and *Il10<sup>HET</sup>* mice were inoculated with approximately 400 spores of *C. difficile*

19 (VPI 10463 strain) or mock infected and sacrificed two days later. **(A-B)** Flow cytometry gating

20 strategy identifying frequency of **(A)** eosinophils, **(B)** neutrophils, monocytes in the large intestine

21 lamina propria of day 2 p.i. *Il10<sup>-/-</sup>* and *Il10<sup>HET</sup>* mice. First FACS plot is gated on live, CD45<sup>+</sup> cells.

22 **(C)** Proinflammatory cytokines and **(D)** chemokines protein levels in the cecal tissue homogenate.

23 Data shown are a combination of two independent experiments (uninfected *Il10<sup>-/-</sup>*, n=7; uninfected

24 *Il10<sup>HET</sup>*, n=6; day 2 infected *Il10<sup>-/-</sup>*, n=8; uninfected *Il10<sup>HET</sup>*, n=7). Data shown are mean  $\pm$  SEM.

25

1 **Supplemental Table 1.** PERMANOVA analysis of unweighted UniFrac distances between the  
2 intestinal microbial communities of antibiotic-treated uninfected and *C. difficile* infected *Il10<sup>-/-</sup>* and  
3 *Il10<sup>HET</sup>* mice at day 2 p.i. Statistical tests performed on data displayed in Figure 2.

4  
5 **Supplemental Table 2.** PERMANOVA analysis of unweighted UniFrac distances between the  
6 intestinal microbial communities of *Il10<sup>-/-</sup>* and C57BL/6 mice starting prior to cohousing (day -64  
7 p.i.), following cohousing (day -55, -47 p.i.), the start of antibiotic treatment (day -6 p.i.), and the  
8 day of infection (day 0 p.i.). Statistical tests performed on data displayed in Supplemental Figure  
9 3.

10

## 11 **Acknowledgements**

12 We thank the members of the Abt lab for helpful discussion and critical reading of the manuscript.  
13 We would also like to thank L. Mattei of the Penn CHOP Microbiome Core and L. Lang of the  
14 Lucille Castori Center for Microbes, Inflammation and Cancer for technical expertise in high  
15 throughput sequencing and E. Pamer for mice strains. Finally, we thank L. Zhao and R. Shimol  
16 of the Penn Human Immunology Core for technical expertise with Luminex assays. This research  
17 was supported by the NIH (R00 AI125786 to M.C.A and T32 AI141393 to E.S.C.).

18

## 1   **References**

- 2   1.    Lessa, F. C. *et al.* Burden of Clostridium Difficile Infection in the United States. *N. Engl. J. Med.* **372**, 825–834  
3       (2015).
- 4   2.    Ofori, E. *et al.* Community-acquired Clostridium difficile: epidemiology, ribotype, risk factors, hospital and  
5       intensive care unit outcomes, and current and emerging therapies. *J. Hosp. Infect.* (2018).  
6       doi:10.1016/j.jhin.2018.01.015
- 7   3.    *Clostridioides difficile*. CDC's 2019 Antibiotic Resistant Threats Report (2019). doi:10.1016/j.tim.2018.09.004
- 8   4.    Guh, A. Y. *et al.* Trends in U.S. Burden of clostridioides difficile infection and outcomes. *N. Engl. J. Med.* **382**,  
9       1320–1330 (2020).
- 10  5.    Collins, J. *et al.* Dietary trehalose enhances virulence of epidemic Clostridium difficile. *Nature* **553**, 291–294  
11       (2018).
- 12  6.    Brown, A. W. W. & Wilson, R. B. Clostridium difficile colitis and zoonotic origins—a narrative review.  
13       *Gastroenterol. Rep.* **6**, 157–166 (2018).
- 14  7.    Khanafar, N. *et al.* Factors predictive of severe Clostridium difficile infection depend on the definition used.  
15       *Anaerobe* **37**, 43–48 (2016).
- 16  8.    Ananthakrishnan, A. N., McGinley, E. L. & Binion, D. G. Excess hospitalisation burden associated with  
17       Clostridium difficile in patients with inflammatory bowel disease. *Gut* **57**, 205–210 (2008).
- 18  9.    Sun, X. & Hirota, S. A. The roles of host and pathogen factors and the innate immune response in the  
19       pathogenesis of Clostridium difficile infection. *Mol. Immunol.* **63**, 193–202 (2015).
- 20  10.   Buonomo, E. L. & Petri, W. A. The microbiota and immune response during Clostridium difficile infection.  
21       *Anaerobe* **41**, 79–84 (2016).
- 22  11.   Péchiné, S. & Collignon, A. Immune responses induced by Clostridium difficile. *Anaerobe* **41**, 68–78 (2016).
- 23  12.   Hasegawa, M. *et al.* Nucleotide-Binding Oligomerization Domain 1 Mediates Recognition of Clostridium  
24       difficile and Induces Neutrophil Recruitment and Protection against the Pathogen. *J. Immunol.* **186**, 4872–  
25       4880 (2011).
- 26  13.   Hasegawa, M. *et al.* Interleukin-22 Regulates the Complement System to Promote Resistance against  
27       Pathobionts after Pathogen-Induced Intestinal Damage. *Immunity* **41**, 620–632 (2014).
- 28  14.   Abt, M. C. *et al.* Innate immune defenses mediated by two ilc subsets are critical for protection against acute  
29       clostridium difficile infection. *Cell Host Microbe* **18**, 27–37 (2015).
- 30  15.   Frisbee, A. L. *et al.* IL-33 drives group 2 innate lymphoid cell-mediated protection during Clostridium difficile  
31       infection. *Nat. Commun.* **10**, 2712 (2019).

- 1 16. Saleh, M. M. *et al.* Colitis-Induced Th17 Cells Increase the Risk for Severe Subsequent Clostridium difficile  
2 Infection. *Cell Host Microbe* 1–10 (2019). doi:10.1016/j.chom.2019.03.003
- 3 17. Buonomo, E. L. *et al.* Role of interleukin 23 signaling in clostridium difficile colitis. *J. Infect. Dis.* **208**, 917–920  
4 (2013).
- 5 18. Jose, S. *et al.* Neutralization of macrophage migration inhibitory factor improves host survival after  
6 Clostridium difficile infection. *Anaerobe* **53**, 56–63 (2018).
- 7 19. Steiner, T. S., Flores, C. A., Pizarro, T. T. & Guerrant, R. L. Fecal lactoferrin, interleukin-1 $\beta$ , and interleukin-8  
8 are elevated in patients with severe Clostridium difficile colitis. *Clin. Diagn. Lab. Immunol.* **4**, 719–722 (1997).
- 9 20. Yu, H. *et al.* Cytokines Are Markers of the Clostridium difficile-induced Inflammatory Response and Predict  
10 Disease Severity. *Clin. vaccine Immunol.* **24**, 1–11 (2017).
- 11 21. El Feghaly, R. E. *et al.* Markers of intestinal inflammation, not bacterial burden, correlate with clinical  
12 outcomes in clostridium difficile infection. *Clin. Infect. Dis.* **56**, 1713–1721 (2013).
- 13 22. Ouyang, W., Rutz, S., Crellin, N. K., Valdez, P. A. & Hymowitz, S. G. Regulation and Functions of the IL-10  
14 Family of Cytokines in Inflammation and Disease. *Annu. Rev. Immunol.* **29**, 71–109 (2011).
- 15 23. Fillatreau, S., Editors, A. O. G. & Freiburg, L. *Interleukin-10 in Health and Disease.* **380**, (2014).
- 16 24. Shouval, D. S. *et al.* *Interleukin 10 receptor signaling: Master regulator of intestinal mucosal homeostasis in*  
17 *mice and humans. Advances in Immunology* **122**, (Elsevier Inc., 2014).
- 18 25. Kühn, R., Löhler, J., Rennick, D., Rajewsky, K. & Müller, W. Interleukin-10-deficient mice develop chronic  
19 enterocolitis. *Cell* **75**, 263–274 (1993).
- 20 26. Sellon, R. K. *et al.* Resident Enteric Bacteria Are Necessary for Development of Spontaneous Colitis and  
21 Immune System Activation in Interleukin-10-Deficient Mice. *Infect. Immun.* **66**, 5224–5231 (1998).
- 22 27. Kullberg, M. C. *et al.* IL-23 plays a key role in Helicobacter hepaticus –induced T cell–dependent colitis . *J.*  
23 *Exp. Med.* **203**, 2485–2494 (2006).
- 24 28. Keubler, L. M., Buettner, M., Häger, C. & Bleich, A. A multihit model: Colitis lessons from the interleukin-10-  
25 deficient mouse. *Inflamm. Bowel Dis.* **21**, 1967–1975 (2015).
- 26 29. Vazquez-Torres, A., Jones-Carson, J., Wagner, R. D., Warner, T. & Balish, E. Early resistance of interleukin-  
27 10 knockout mice to acute systemic candidiasis. *Infect. Immun.* **67**, 670–674 (1999).
- 28 30. Sewnath, M. E. *et al.* IL-10-Deficient Mice Demonstrate Multiple Organ Failure and Increased Mortality During  
29 Escherichia coli Peritonitis Despite an Accelerated Bacterial Clearance. *J. Immunol.* **166**, 6323–6331 (2014).
- 30 31. Arai, T. *et al.* Effects of in vivo administration of anti-IL-10 monoclonal antibody on the host defence  
31 mechanism against murine Salmonella infection. *Immunology* **85**, 381–388 (1995).

- 1 32. Villegas, E. N. *et al.* Blockade of costimulation prevents infection-induced immunopathology in interleukin-10-  
2 deficient mice. *Infect. Immun.* **68**, 2837–2844 (2000).
- 3 33. Dann, S. M. *et al.* Attenuation of intestinal inflammation in interleukin-10-deficient mice infected with  
4 *Citrobacter rodentium*. *Infect. Immun.* **82**, 1949–1958 (2014).
- 5 34. Leber, A. *et al.* Systems modeling of interactions between mucosal immunity and the gut microbiome during  
6 *Clostridium difficile* infection. *PLoS One* **10**, 1–19 (2015).
- 7 35. Peñaloza, H. F. *et al.* Opposing roles of IL-10 in acute bacterial infection. *Cytokine Growth Factor Rev.* **32**,  
8 17–30 (2016).
- 9 36. Grainger, J. R. *et al.* Inflammatory monocytes regulate pathologic responses to commensals during acute  
10 gastrointestinal infection. *Nat. Med.* **19**, 713–721 (2013).
- 11 37. Brooks, D. G. *et al.* Interleukin-10 determines viral clearance or persistence in vivo. *Nat. Med. Vol.* **12**, (2006).
- 12 38. Ryan, A. *et al.* A role for TLR4 in *clostridium difficile* infection and the recognition of surface layer proteins.  
13 *PLoS Pathog.* **7**, e1002076 (2011).
- 14 39. Jafari, N. V. *et al.* *Clostridium difficile* Modulates Host Innate Immunity via Toxin-Independent and Dependent  
15 Mechanism(s). *PLoS One* **8**, 1–10 (2013).
- 16 40. Lynch, M. *et al.* Surface layer proteins from virulent *Clostridium difficile* ribotypes exhibit signatures of positive  
17 selection with consequences for innate immune response. *BMC Evol. Biol.* **17**, 90 (2017).
- 18 41. Rutz, S., Ouyang, W., Rutz, S. & Ouyang, W. Regulation of Cytokine Gene Expression in Immunity and  
19 Diseases. *Adv. Exp. Med. Biol.* **941**, (2016).
- 20 42. Snapper, S. B., McInnis, C. M., Conaway, E. A., de Oliveira, D. C. & Horwitz, B. H. Inhibition of Inflammatory  
21 Gene Transcription by IL-10 Is Associated with Rapid Suppression of Lipopolysaccharide-Induced Enhancer  
22 Activation. *J. Immunol.* **198**, 2906–2915 (2017).
- 23 43. Abt, M. C., McKenney, P. T. & Pamer, E. G. *Clostridium difficile* colitis: Pathogenesis and host defence. *Nat.*  
24 *Rev. Microbiol.* **14**, 609–620 (2016).
- 25 44. Jarchum, I., Liu, M., Shi, C., Equinda, M. & Pamer, E. G. Critical role for myd88-Mediated Neutrophil  
26 recruitment during *Clostridium difficile* colitis. *Infect. Immun.* **80**, 2989–2996 (2012).
- 27 45. Buonomo, E. L. *et al.* Microbiota-Regulated IL-25 Increases Eosinophil Number to Provide Protection during  
28 *Clostridium difficile* Infection. *Cell Rep.* **16**, 432–443 (2016).
- 29 46. Chassaing, B. *et al.* Fecal Lipocalin 2, a Sensitive and Broadly Dynamic Non-Invasive Biomarker for Intestinal  
30 Inflammation. *PLoS One* **7**, 3–10 (2012).
- 31 47. Gunasekera, D. C. *et al.* The development of colitis in Il10<sup>-/-</sup> mice is dependent on IL-22. *Mucosal Immunol.*



- 1 (2020). doi:10.1038/s41385-019-0252-3
- 2 48. Jarry, A. *et al.* Mucosal IL-10 and TGF- $\beta$  play crucial roles in preventing LPS-driven, IFN- $\gamma$ -mediated  
3 epithelial damage in human colon explants. *J. Clin. Invest.* **118**, 1132–1142 (2008).
- 4 49. Proinflammatory Role of Monocyte-Derived CX3CR1<sup>int</sup> Macrophages in Helicobacter hepaticus-Induced  
5 Colitis Calum. *Infect. Immun.* **86**, e00579-17 (2018).
- 6 50. Young, V. B. *et al.* Tryptophan Catabolism Restricts IFN- $\gamma$ -Expressing Neutrophils and Clostridium difficile  
7 Immunopathology. *J. Immunol.* **193**, 807–816 (2014).
- 8 51. Kim, M. N. *et al.* Clostridium difficile infection aggravates colitis in interleukin 10-deficient mice. *World J.*  
9 *Gastroenterol.* **20**, 17084–17091 (2014).
- 10 52. Zhang, T. *et al.* Clostridium Difficile Infection Worsen Outcome of Hospitalized Patients with Inflammatory  
11 Bowel Disease. *Sci. Rep.* **6**, 1–8 (2016).
- 12 53. Zhou, F. *et al.* Mice with inflammatory bowel disease are susceptible to clostridium difficile infection with  
13 severe disease outcomes. *Inflamm. Bowel Dis.* **24**, 573–582 (2018).
- 14 54. Bernshtein, B. *et al.* IL-23-producing IL-10R $\alpha$ -deficient gut macrophages elicit an IL-22-driven  
15 proinflammatory epithelial cell response. *Sci. Immunol.* **4**, 1–15 (2019).
- 16 55. Nagao-kitamoto, H. *et al.* Interleukin-22-mediated host glycosylation prevents Clostridioides difficile infection  
17 by modulating the metabolic activity of the gut microbiota. *Nat. Med.* (2020).
- 18 56. Zheng, Y. *et al.* Interleukin-22 mediates early host defense against attaching and effacing bacterial  
19 pathogens. *Nat. Med.* **14**, 282–289 (2008).
- 20 57. Behnsen, J. *et al.* The Cytokine IL-22 Promotes Pathogen Colonization by Suppressing Related Commensal  
21 Bacteria. *Immunity* **40**, 262–273 (2014).
- 22 58. Couturier-Maillard, A. *et al.* Interleukin-22-deficiency and microbiota contribute to the exacerbation of  
23 Toxoplasma gondii-induced intestinal inflammation article. *Mucosal Immunol.* **11**, 1181–1190 (2018).
- 24 59. Zackular, J. P. *et al.* Dietary zinc alters the microbiota and decreases resistance to Clostridium difficile  
25 infection. *Nat. Med.* **22**, 1330–1334 (2016).
- 26 60. Gunasekera, D. C. *et al.* The development of colitis in Il10  $-/-$  mice is dependent on IL-22. *Mucosal Immunol.*  
27 (2020). doi:10.1038/s41385-019-0252-3
- 28 61. Steed, A. L. *et al.* The microbial metabolite desaminotyrosine protects from influenza through type I  
29 interferon. *Science (80-. ).* **502**, 498–502 (2017).
- 30 62. Ganai, S. C. *et al.* Priming of Natural Killer Cells by Nonmucosal Mononuclear Phagocytes Requires  
31 Instructive Signals from Commensal Microbiota. *Immunity* **37**, 171–186 (2012).

- 1 63. Abt, M. C. *et al.* Commensal Bacteria Calibrate the Activation Threshold of Innate Antiviral Immunity Michael.  
2 *Immunity* **37**, 158–170 (2012).
- 3 64. Kullberg, M. C. *et al.* Helicobacter hepaticus triggers colitis in specific-pathogen-free interleukin-10 (IL-10)-  
4 deficient mice through an IL-12-and gamma interferon- dependent mechanism. *Infect. Immun.* **66**, 5157–5166  
5 (1998).
- 6 65. Kozich, J. J., Westcott, S. L., Baxter, N. T., Highlander, S. K. & Schloss, P. D. Development of a dual-index  
7 sequencing strategy and curation pipeline for analyzing amplicon sequence data on the miseq illumina  
8 sequencing platform. *Appl. Environ. Microbiol.* **79**, 5112–5120 (2013).
- 9 66. Bolyen, E. *et al.* Reproducible, interactive, scalable and extensible microbiome data science using QIIME 2.  
10 *Nat. Biotechnol.* **37**, 852–857 (2019).
- 11 67. Callahan, B. J. *et al.* DADA2: High-resolution sample inference from Illumina amplicon data. *Nat. Methods* **13**,  
12 581–583 (2016).
- 13 68. Team, R. C. R: A language and environment for statistical computing. *R Found. Stat. Comput.* 1–16 (2020).  
14 doi:10.1108/eb003648
- 15 69. Bokulich, N. A. *et al.* q2-sample-classifier: machine-learning tools for microbiome classification and  
16 regression. *J. open source Softw.* **3**, (2018).
- 17 70. McDonald, D. *et al.* An improved Greengenes taxonomy with explicit ranks for ecological and evolutionary  
18 analyses of bacteria and archaea. *ISME J.* **6**, 610–618 (2012).
- 19 71. Katoh, K., Misawa, K., Kuma, K. I. & Miyata, T. MAFFT: A novel method for rapid multiple sequence  
20 alignment based on fast Fourier transform. *Nucleic Acids Res.* **30**, 3059–3066 (2002).
- 21 72. Price, M. N., Dehal, P. S. & Arkin, A. P. FastTree 2 - Approximately maximum-likelihood trees for large  
22 alignments. *PLoS One* **5**, (2010).
- 23 73. McMurdie, P. J. & Holmes, S. Phyloseq: An R Package for Reproducible Interactive Analysis and Graphics of  
24 Microbiome Census Data. *PLoS One* **8**, (2013).
- 25 74. Wickham, H. *ggplot2 – Elegant Graphics for Data Analysis.* Springer-Verlag (2016).  
26 doi:10.18637/jss.v077.b02
- 27 75. Lozupone, C. & Knight, R. UniFrac: A new phylogenetic method for comparing microbial communities. *Appl.*  
28 *Environ. Microbiol.* **71**, 8228–8235 (2005).
- 29 76. Wickham, H. *et al.* Welcome to the Tidyverse. *J. Open Source Softw.* **4**, 1686 (2019).

30

Figure 1

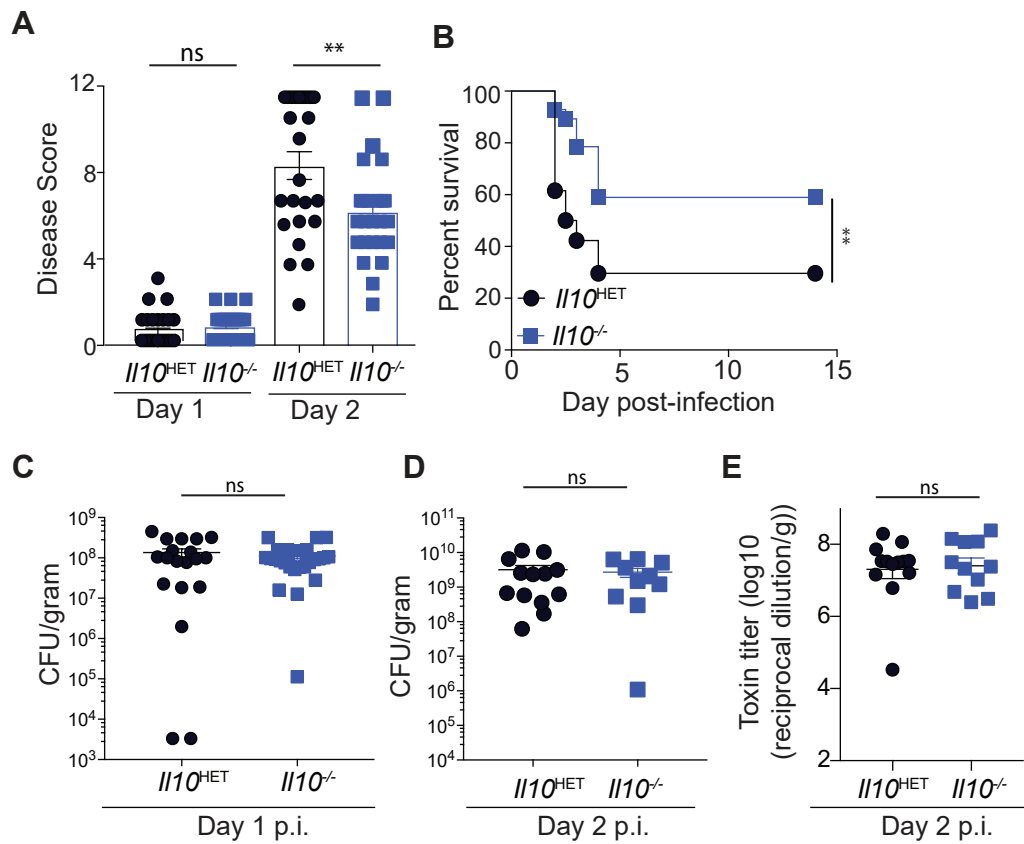

**Figure 1: Genetic ablation of II10 results in reduced susceptibility to *C. difficile* infection.**

II10<sup>-/-</sup> and II10<sup>HET</sup> mice were inoculated with approximately 400 spores of *C. difficile* (VPI 10463 strain) and monitored daily for disease. (A) Disease score and (B) survival following infection. Data shown are a combination of five independent experiments (II10<sup>-/-</sup>, n=23; II10<sup>HET</sup>, n=25). (C) *C. difficile* burden in fecal pellets at day 1 p.i.. (D) *C. difficile* burden and (E) *C. difficile* toxin levels in the cecal content at day 2 p.i. \*\* = p<0.01. Statistical significance was calculated by a Log-rank test.

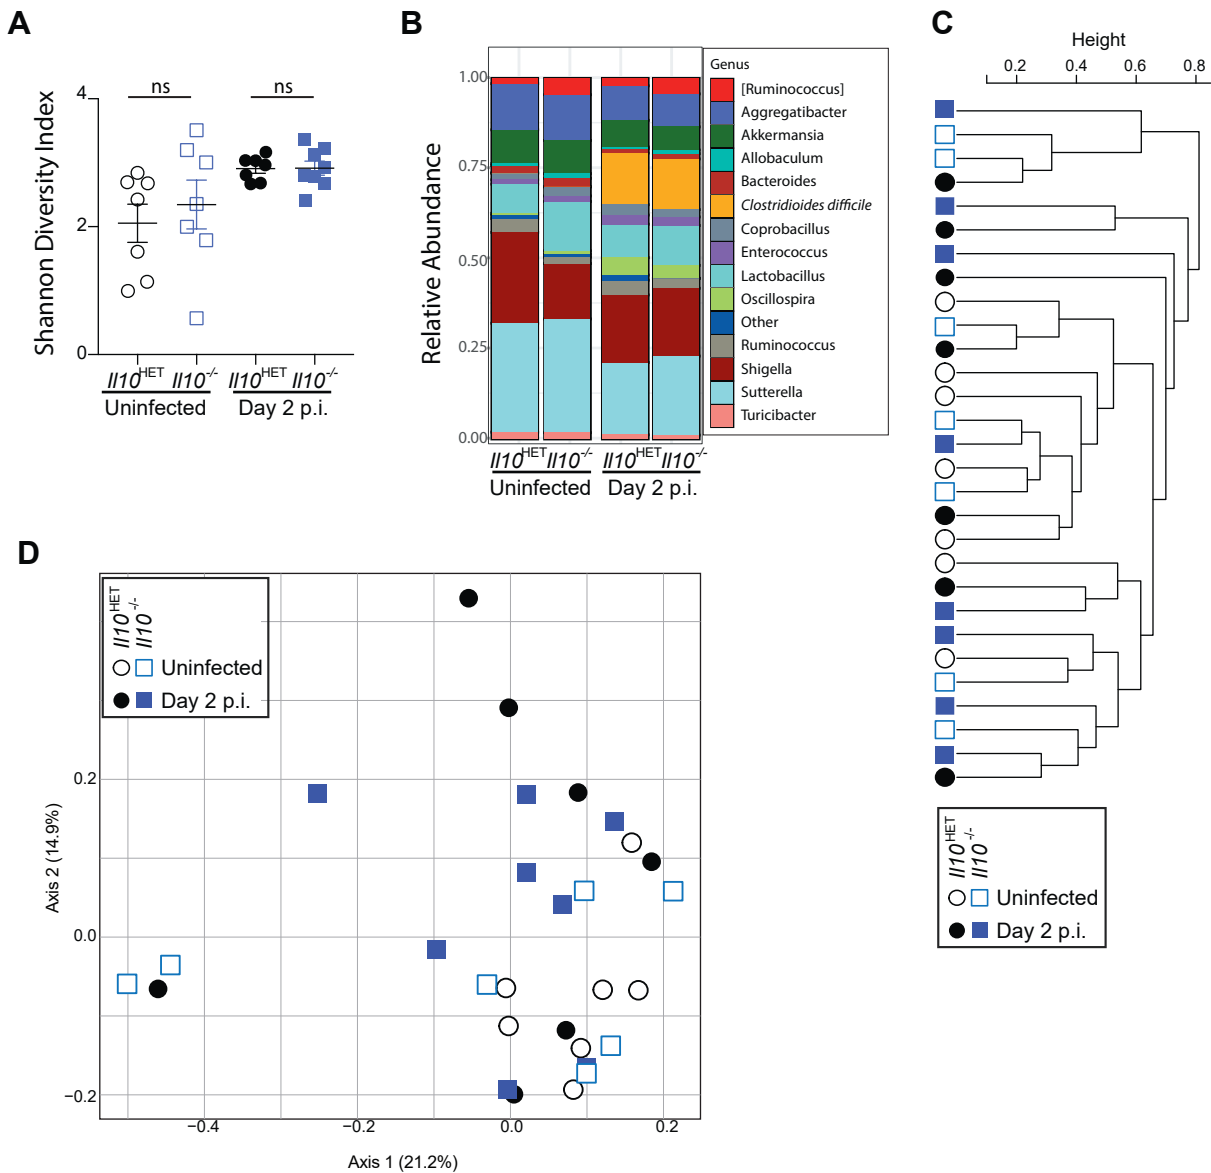

**Figure 2: *C. difficile*-infected  $II10^{-/-}$  mice and  $II10^{HET}$  mice exhibit a similar microbiome composition.** ABX-treated uninfected and *C. difficile* infected  $II10^{-/-}$  mice and  $II10^{HET}$  mice were sacrificed at day 2 p.i. and cecal content processed for 16s rRNA bacterial gene profiling. (A) Microbial alpha diversity as determined by the Shannon diversity index. (B) Relative abundance of top 15 bacterial ASVs. Bar plot is displayed at the genus level except for orange bars that represent an ASV aligning to *C. difficile*. (C) Dendrogram representation of intestinal microbial communities using unsupervised hierarchical clustering of unweighted UniFrac distances to identify similarities between samples. (D) Unweighted UniFrac principal coordinate analysis plot of 16S bacterial rRNA ASVs.

Figure 3

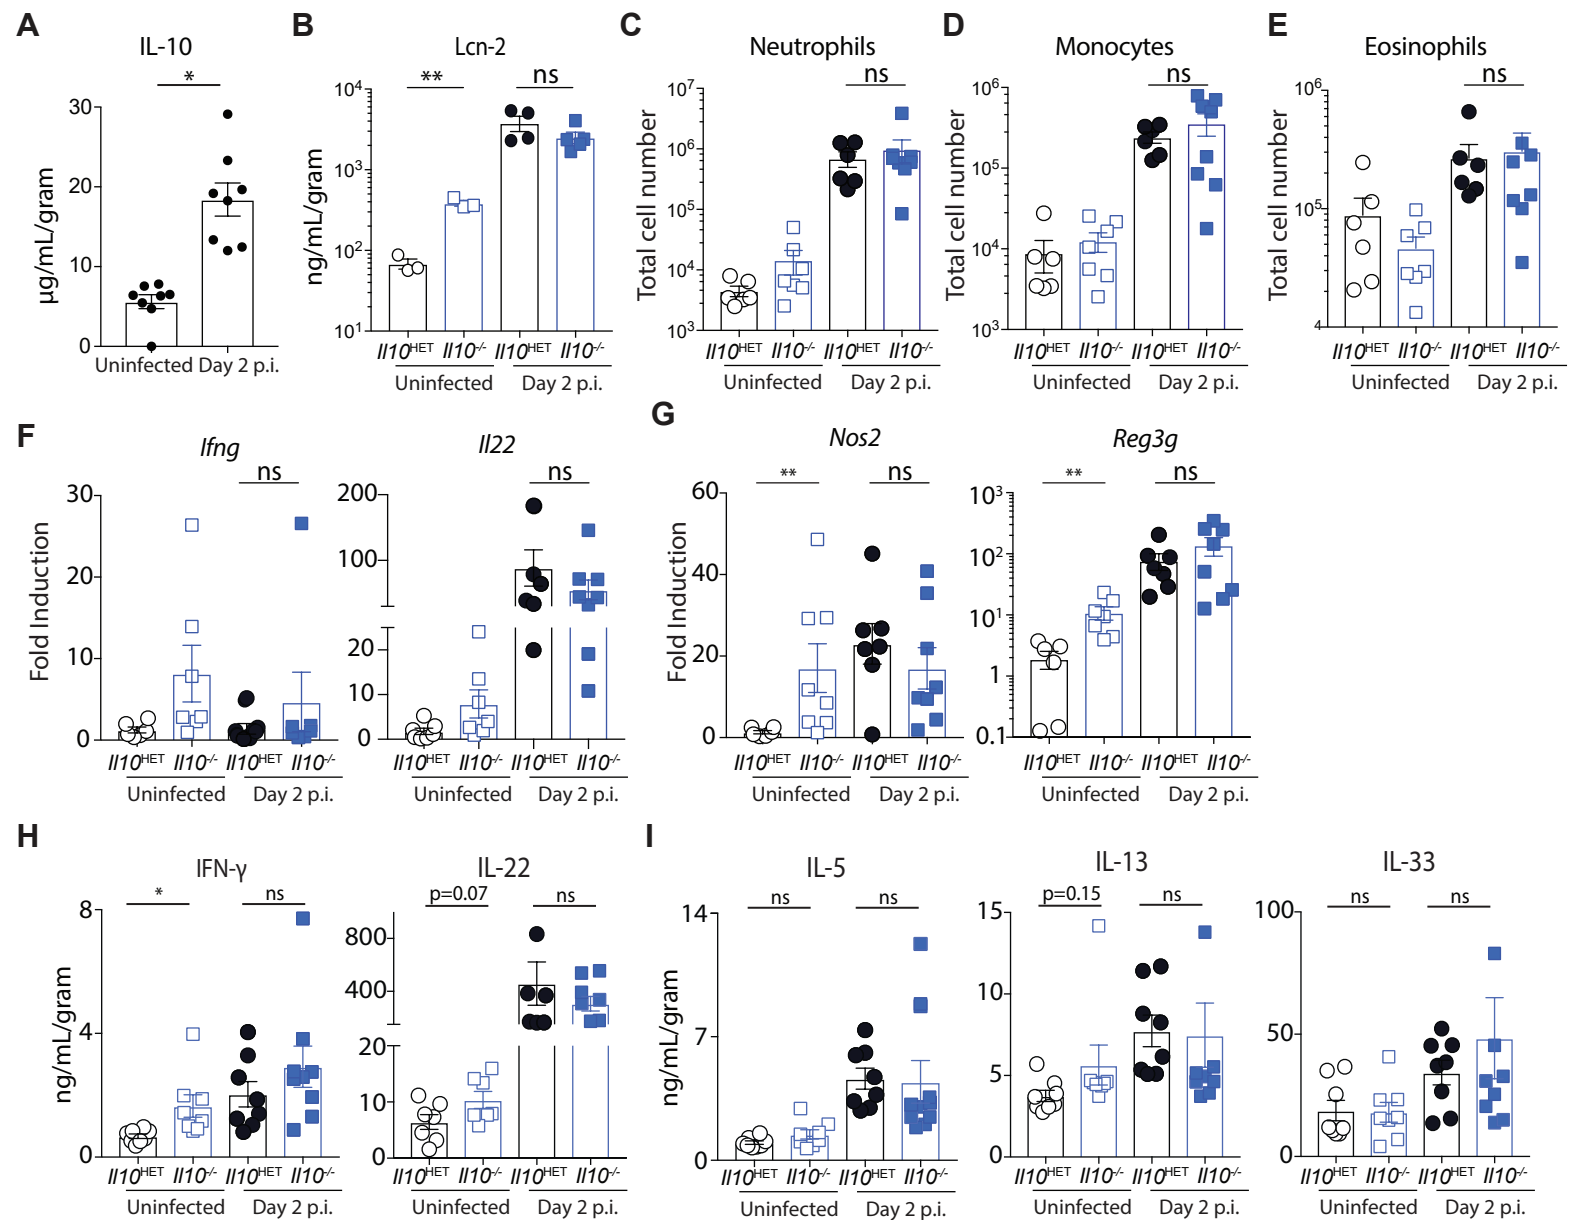

**Figure 3: *Il10*<sup>-/-</sup> and *Il10*<sup>HET</sup> mice exhibit a comparable induction of the innate immune response following acute *C. difficile* infection.** (A) IL-10 protein levels in the cecal tissue homogenates of antibiotic-treated uninfected and day 2 p.i. C57BL/6 mice. (B-H) *Il10*<sup>-/-</sup> and *Il10*<sup>HET</sup> mice were inoculated with approximately 400 spores of *C. difficile* (VPI 10463 strain) or mock infected and sacrificed two days later. (B) LCN-2 protein levels in the cecal supernatants. (C-E) Large intestine lamina propria cells were harvested and assessed by flow cytometry for (C) neutrophils (CD11b+, Ly6G+), (D) monocyte (CD11b+, Ly6C+, Ly6G-) and (E) Eosinophil (SSChi, CD11b+, Siglec-F+) recruitment. (F) Fold induction of *Irfng*, *Il22* and (G) IFN-γ and *Il22* effector molecules in the colon at day 2 p.i. relative to uninfected *Il10*<sup>HET</sup> mice and normalized to *Hprt*. (H) IFN-γ, IL-22, and (I) type-2 associated cytokine protein levels in the cecal tissue homogenate. Data shown are a combination of two independent experiments (uninfected *Il10*<sup>-/-</sup>, n=7; uninfected *Il10*<sup>HET</sup>, n=6; day 2 infected *Il10*<sup>-/-</sup>, n=8; uninfected *Il10*<sup>HET</sup>, n=7). Data shown are mean ± SEM. \* = p < 0.05. \*\* = p < 0.01. Statistical significance was calculated by an unpaired t-test.

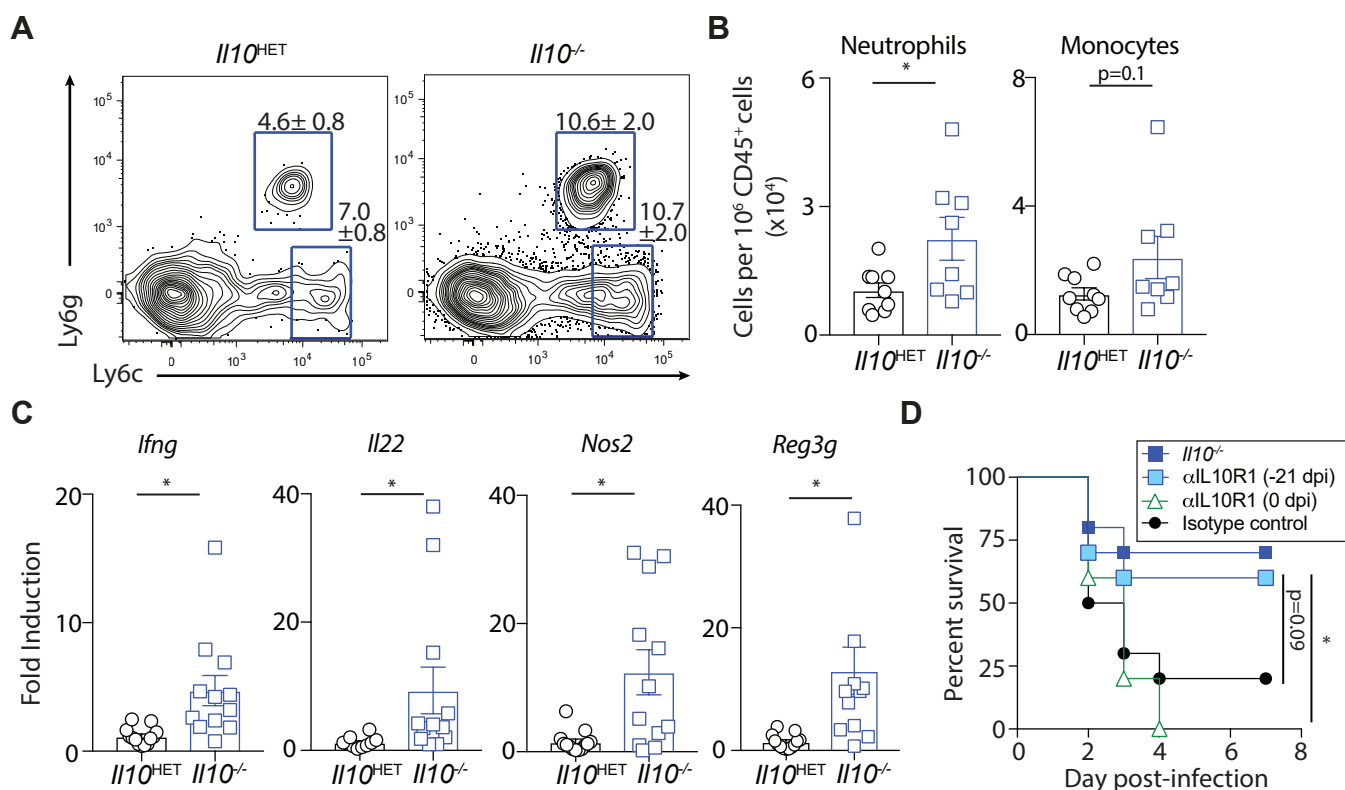

**Figure 4: Loss of IL-10 signaling enhances intestinal immune activation prior to infection and decreases susceptibility to acute *C. difficile* infection.** Antibiotic-treated uninfected and *II10<sup>-/-</sup>* mice and *II10<sup>HET</sup>* mice were sacrificed at the day of infection (prior to inoculation). (A) Frequency of neutrophils and monocytes in the large intestine lamina propria. FACS plots gated on live, CD45<sup>+</sup>, Non-T, Non-B cells, Siglec-Fneg, CD11b<sup>+</sup> cells. (B) Total number of neutrophils, monocytes and eosinophils in the large intestine lamina propria. Data is a combination representative of two independent experiments. *II10<sup>-/-</sup>*, n=8; *II10<sup>HET</sup>*, n=9. (C) Fold induction of type-1 and type-17 associated effector molecules in the colon of antibiotic-treated, uninfected *II10<sup>-/-</sup>* mice relative to antibiotic treated uninfected *II10<sup>HET</sup>* mice and normalized to Hprt. Data is a combination representative of three independent experiments. *II10<sup>-/-</sup>*, n=12; *II10<sup>HET</sup>*, n=13. Data shown are mean ± SEM. (D) C57BL/6 mice were cohoused with *II10<sup>-/-</sup>* mice for two weeks then were administered anti-IL10R1 or isotype control (Rat IgG1) by i.p. injection weekly for three weeks prior to infection or received a single dose of anti-IL10R1 on the day of *C. difficile* infection and assessed for survival following infection. Data are a combination of two independent experiments (n=8 per group). \* = p < 0.05. Statistical significance was calculated by an unpaired t-test or a log-rank test.

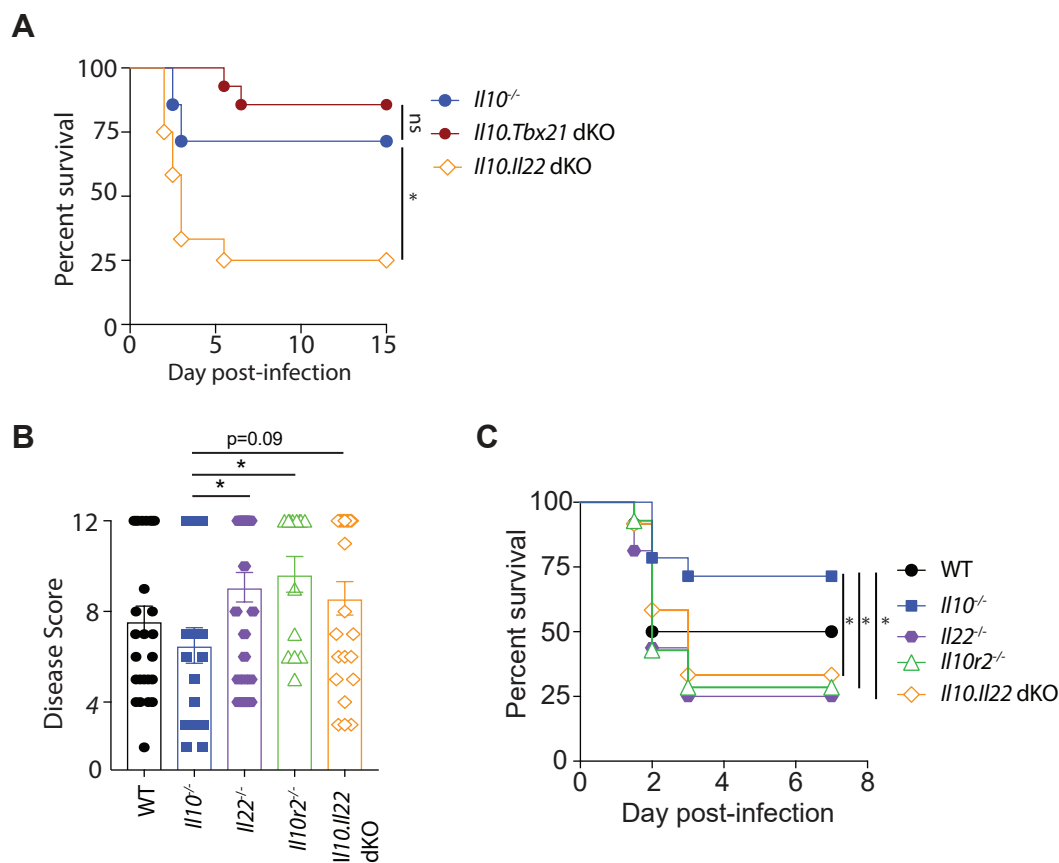

**Figure 5. IL-22 signaling is required for protection against *C. difficile* infection in *Il10*<sup>-/-</sup> mice.** (A) Cohoused wild-typel10<sup>-/-</sup>, *Il10.II22* dKO and *Il10.Tbx21* dKO mice were inoculated with approximately 400 spores of *C. difficile* (VPI 10463 strain) and assessed for survival following infection. Survival curve is a combination of three independent experiments. (*Il10*<sup>-/-</sup>, n=7; *Il10.II22* dKO, n=12; *Il10.Tbx21* dKO, n=14). (B) Disease severity at day 2 p.i. and (C) survival curve of cohoused B6 or *Il10*HET, *Il10*<sup>-/-</sup>, *Il10r2*<sup>-/-</sup>, *Il10*<sup>-/-</sup>, and *Il10.II22* dKO mice following *C. difficile* infection. Data shown are a combination of four independent experiments (B6, n=12; *Il10*<sup>-/-</sup>, n=14; *Il10r2*<sup>-/-</sup>, n=14; *Il22*<sup>-/-</sup>, n=16; *Il10.II22* dKO, n=12). \* = p<0.05. Statistical significance was calculated by an unpaired t-test or a log-rank test.
